# Supplementary material for: A global Corynebacterium diphtheriae genomic framework sheds light on current diphtheria reemergence
Source: bioRxiv or medRxiv preprint supplement (doi:10.1101/2023.02.20.529124), 2023-08-21
Supplement: Supplementary file [file media-1.pdf]

# Supplementary appendix

## A global *Corynebacterium diphtheriae* genomic framework sheds light on current diphtheria reemergence

### Authors

Melanie Hennart <sup>a,b,c</sup>, Chiara Crestani <sup>a</sup>, Sebastien Bridel <sup>a</sup>, Nathalie Armatys <sup>a,b</sup>, Sylvie Brémont <sup>a,b</sup>, Annick Carmi-Leroy <sup>a,b</sup>, Annie Landier <sup>a,b</sup>, Virginie Passet <sup>a,b</sup>, Laure Fonteneau <sup>e</sup>, Sophie Vaux <sup>e</sup>, Julie Toubiana <sup>a,b,d</sup>, Edgar Badell <sup>a,b</sup> and Sylvain Brisse <sup>a,b,\*</sup>

### Affiliations

<sup>a</sup> Institut Pasteur, Université Paris Cité, Biodiversity and Epidemiology of Bacterial Pathogens, F-75015, Paris, France

<sup>b</sup> Institut Pasteur, National Reference Center for Corynebacteria of the Diphtheriae Complex, Paris, France

<sup>c</sup> Sorbonne Université, Collège doctoral, F-75005 Paris, France

<sup>d</sup> Department of General Pediatrics and Pediatric Infectious Diseases, Hôpital Necker-Enfants Malades, APHP, Université de Paris, Paris, France

<sup>e</sup> Santé publique France, Saint-Maurice, France

### Contents:

Supplementary tables S1 to S4

Supplementary figures S1 to S9

30

31

## Supplementary tables

32

33 **Table S1.** Characteristics of the 1,350 *Corynebacterium diphtheriae* isolates

34

35 **Table S2.** Virulence-associated genes

36

37 **Table S3.** Zone diameter interpretative breakpoints used for antimicrobial agents

38

39 **Table S4.** Antimicrobial susceptibility phenotypes of the France-2022 isolates

40

41

- *See separately attached tables* -

42

43

44  
45  
46  
47  
48  
49  
50  
51  
52  
53  
54  
55  
56  
57  
58  
59  
60  
61  
62  
63  
64  
65  
66  
67

## Supplementary figures

**Figure S1.** Epidemiological curve of *tox*-positive *C. diphtheriae* infections in France

**Figure S2.** Flowchart of the main analytical steps of DIPHTOSCAN

**Figure S3.** Bioinformatics tools integrated into DIPHTOSCAN

**Figure S4.** Custom features of DIPHTOSCAN database

**Figure S5.** Sublineage frequency comparisons between datasets

**Figure S6.** Phylogenetic tree of 1,350 *Corynebacterium diphtheriae*

**Figure S7.** Phylogenetic position of the ribotype reference strains of *Corynebacterium diphtheriae*

**Figure S8.** Sublineage distribution of resistance features, including *pbp2m* and *ermX*

**Figure S9.** Phylogenetic distribution of iron metabolism and adhesion-associated genes in *Corynebacterium diphtheriae* lineages Mitis and Gravis

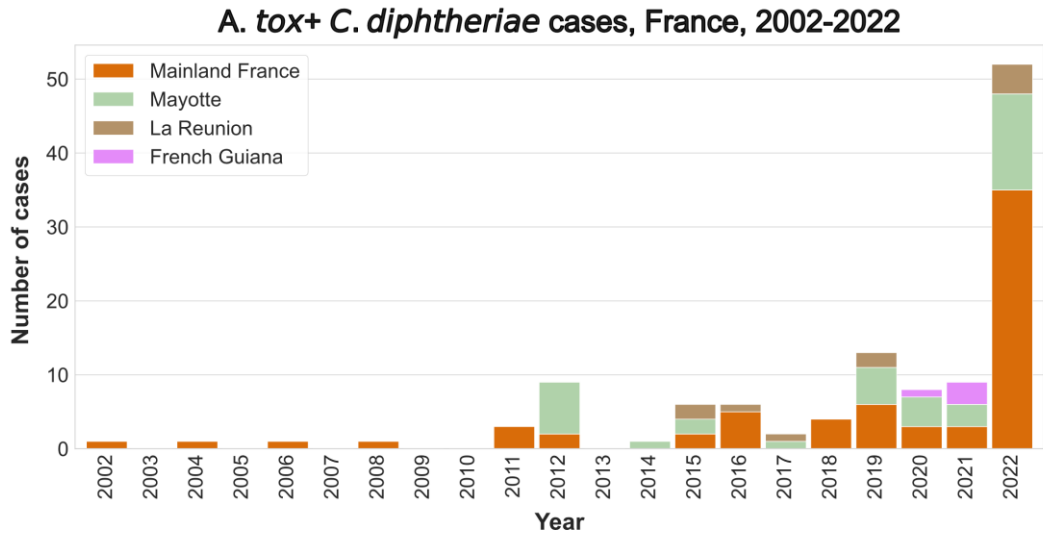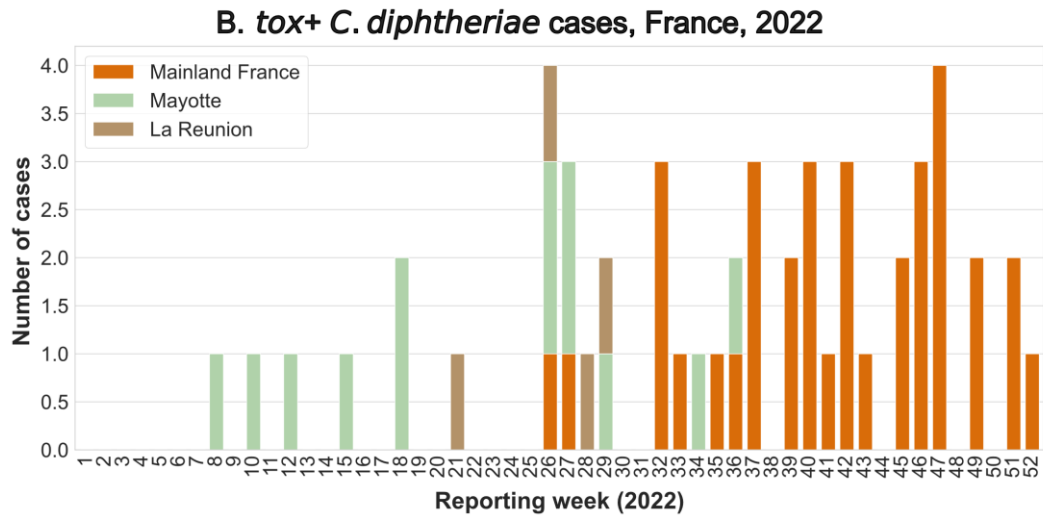

68  
 69  
 70  
 71  
 72  
 73  
 74  
 75  
 76  
 77  
 78  
 79  
 80

**Figure S1. Epidemiological curve of *tox*-positive *C. diphtheriae* infections in France**  
**A.** Number of reported cases by year, France, 2002-2022; **B.** Number of reported cases by week, France, 2022. The cases were either from metropolitan France, or overseas territories (see color key).

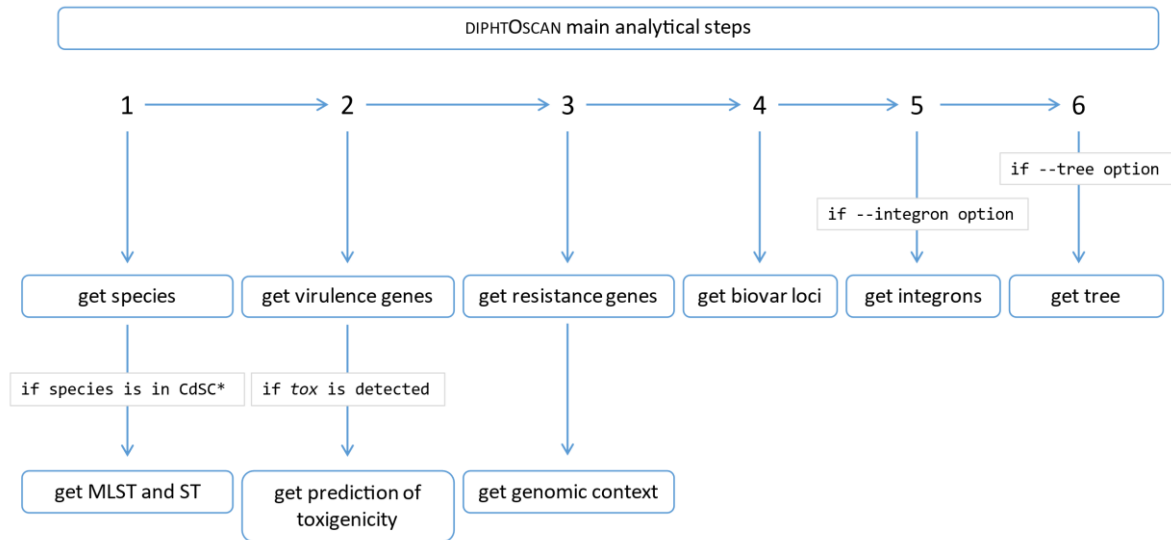

\*CdSC: *Corynebacterium diphtheriae* species complex

81  
82  
83  
84  
85  
86  
87  
88  
89  
90  
91  
92  
93  
94  
95  
96  
97  
98  
99  
100  
101  
102

**Figure S2. Flowchart of the main analytical steps of DIPHTOSCAN**

DIPHTOSCAN starts with a taxonomic check, and then proceeds to virulence genes detection (including the *tox* gene, and its possible truncations), resistance features (genes and mutations, and their co-localization), and biovar-associated genes (*spuA* and *nar* clusters). Optionally, the presence of integrons is detected, and a k-mer distance-based tree can be built.

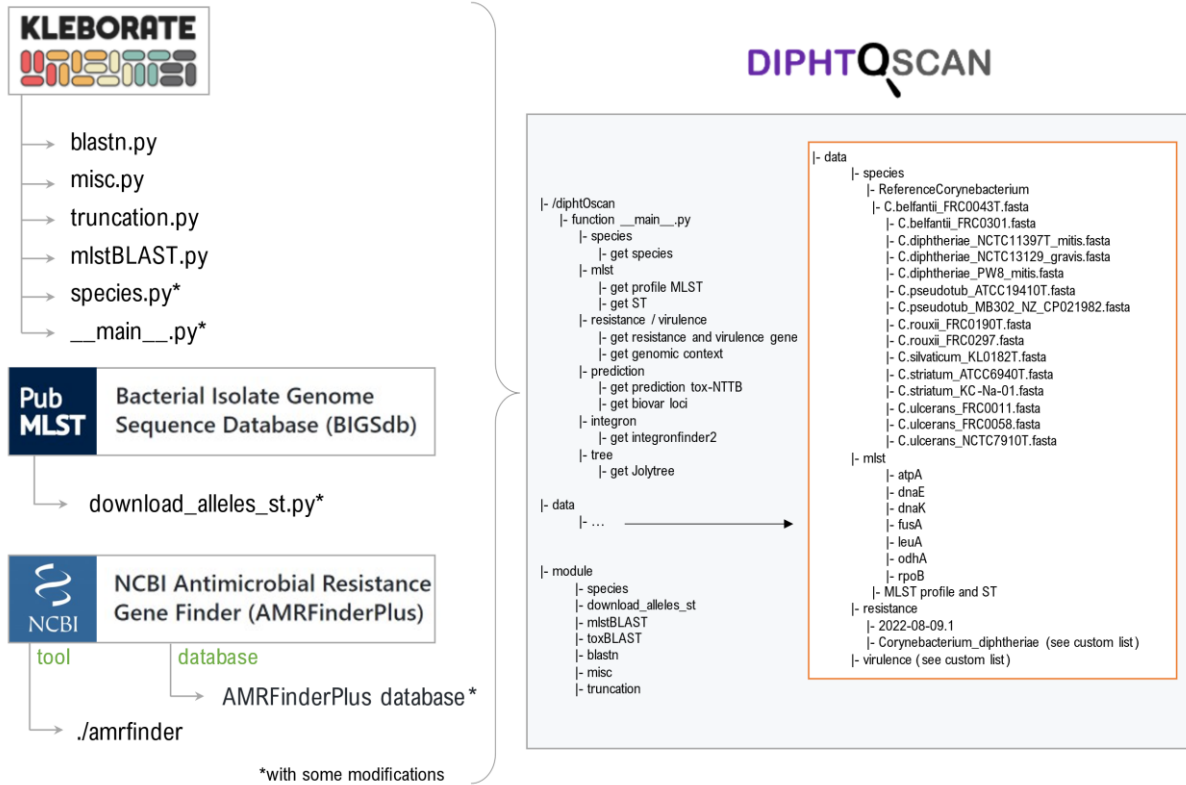

103  
 104  
 105  
 106  
 107  
 108  
 109  
 110  
 111  
 112  
 113  
 114  
 115  
 116  
 117  
 118  
 119

**Figure S3. Bioinformatics tools integrated into DIPHTOSCAN**

DIPHTOSCAN is a pipeline which groups a set of novel scripts and adaptations of previous tools, including Kleborate, BIGSdb, AMRFinderPlus and IntegronFinder2.

## Custom features of DIPHTOSCAN

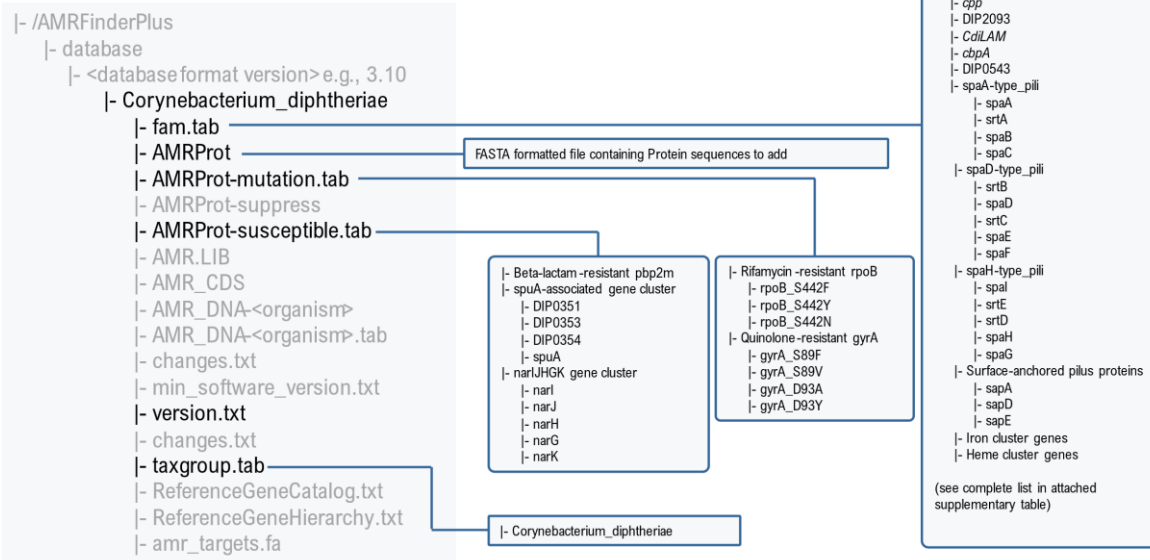

120  
121  
122  
123  
124  
125  
126  
127  
128  
129  
130  
131  
132  
133  
134  
135  
136  
137  
138  
139  
140

### Figure S4. Custom features of DIPHTOSCAN database

Description of the custom features of the DIPHTOSCAN database. The database was built by adding to the AMRFinderPlus database, *ad-hoc* resistance and virulence genes, as well as molecular determinants to predict the biovar.

141 **A. Effect of deduplication of the global dataset**

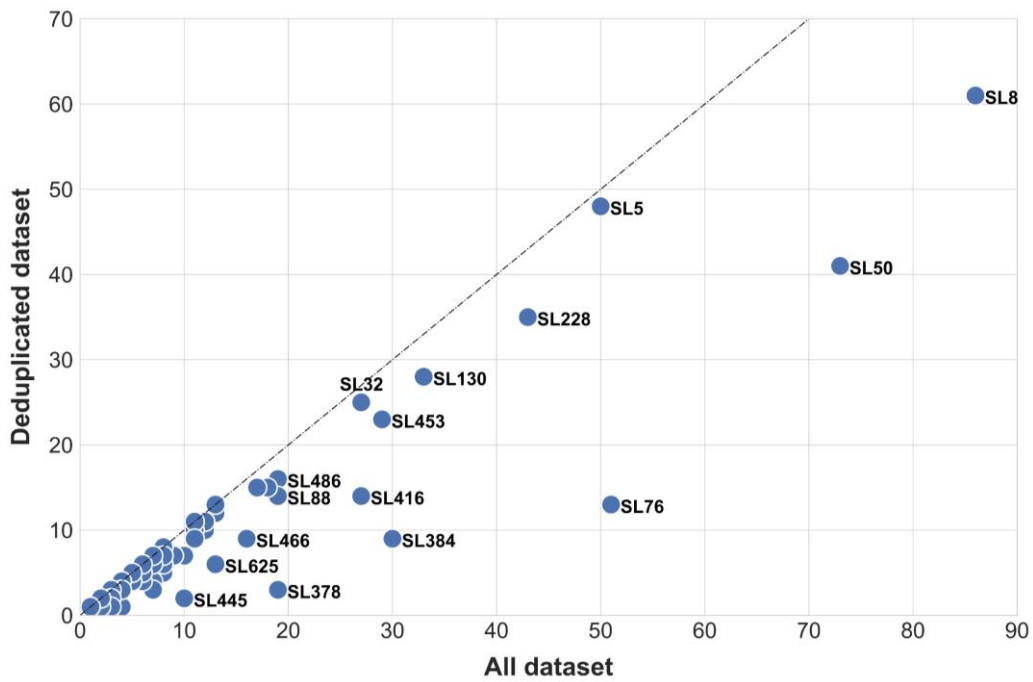

142

143 **B. Sublineage representation in France-2022 versus the**  
 144 **deduplicated dataset.**

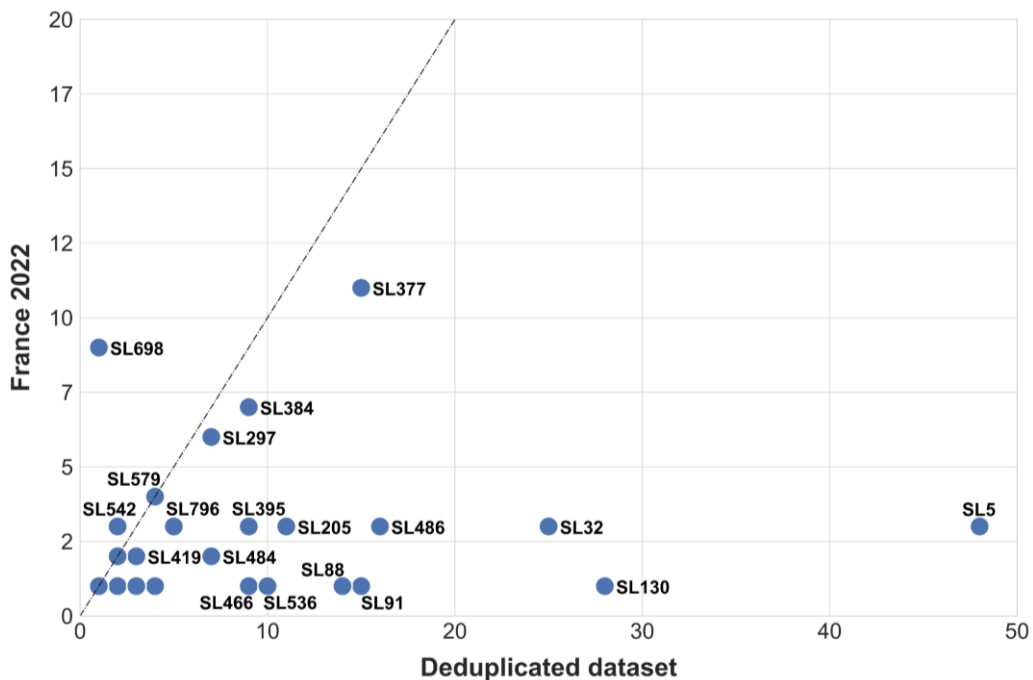

145

146

147 **Figure S5. Sublineage frequency comparisons between datasets**

148 **A.** Effect of deduplication of the global dataset. X-axis: The number of isolates in the entire  
 149 global dataset (n=1,249 genomes). Y-axis: The number of isolates in the deduplicated global



150 dataset (n=976). Each sublineage is represented as a circle; the main sublineages' identifiers  
151 are shown.

152 **B.** Sublineage representation in France-2022 *versus* the global (deduplicated) dataset. X-axis:  
153 The number of isolates in the deduplicated dataset (n=976 genomes). Y-axis: The number of  
154 isolates in the France-2022 dataset (n=101). Each sublineage is represented as a circle; the main  
155 sublineages' identifiers are shown.

156

157

158

159

160

161

162

163

164

165

166

167

168

169

170

171

172

173

174

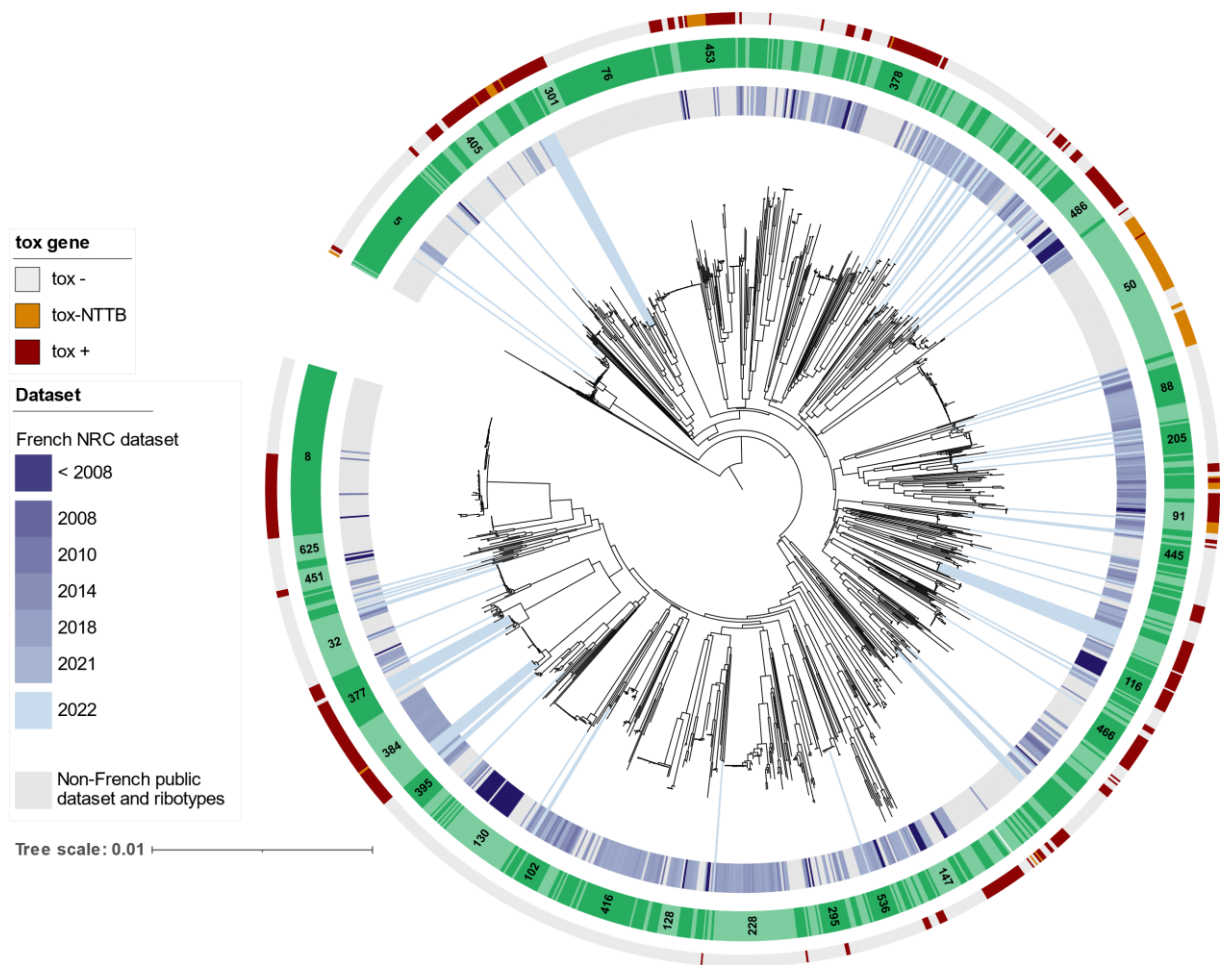

175  
176  
177

178 **Figure S6. Phylogenetic tree of 1,350 *Corynebacterium diphtheriae***

179 The tree shows the placement of the France-2022 isolates (n=101) within the diversity of the  
 180 1,249 global non-duplicated genomes. The tree was generated using JolyTree (Criscuolo,  
 181 2020). The scale bar represents the number of nucleotide substitutions per site. The first circle  
 182 indicates the dataset, with France-2022 isolates indicated with light-blue rays from the tree  
 183 leaves, and a blue color gradient (darker blue for older isolates) for French NRC isolates prior  
 184 to 2022. Grey color sectors correspond to the global genomes. The second inner circle indicates  
 185 sublineage alternation; main sublineages are labeled within the sectors. The following circle  
 186 indicates the presence, disruption or absence of the diphtheria toxin *tox* gene (see key).

187  
188  
189



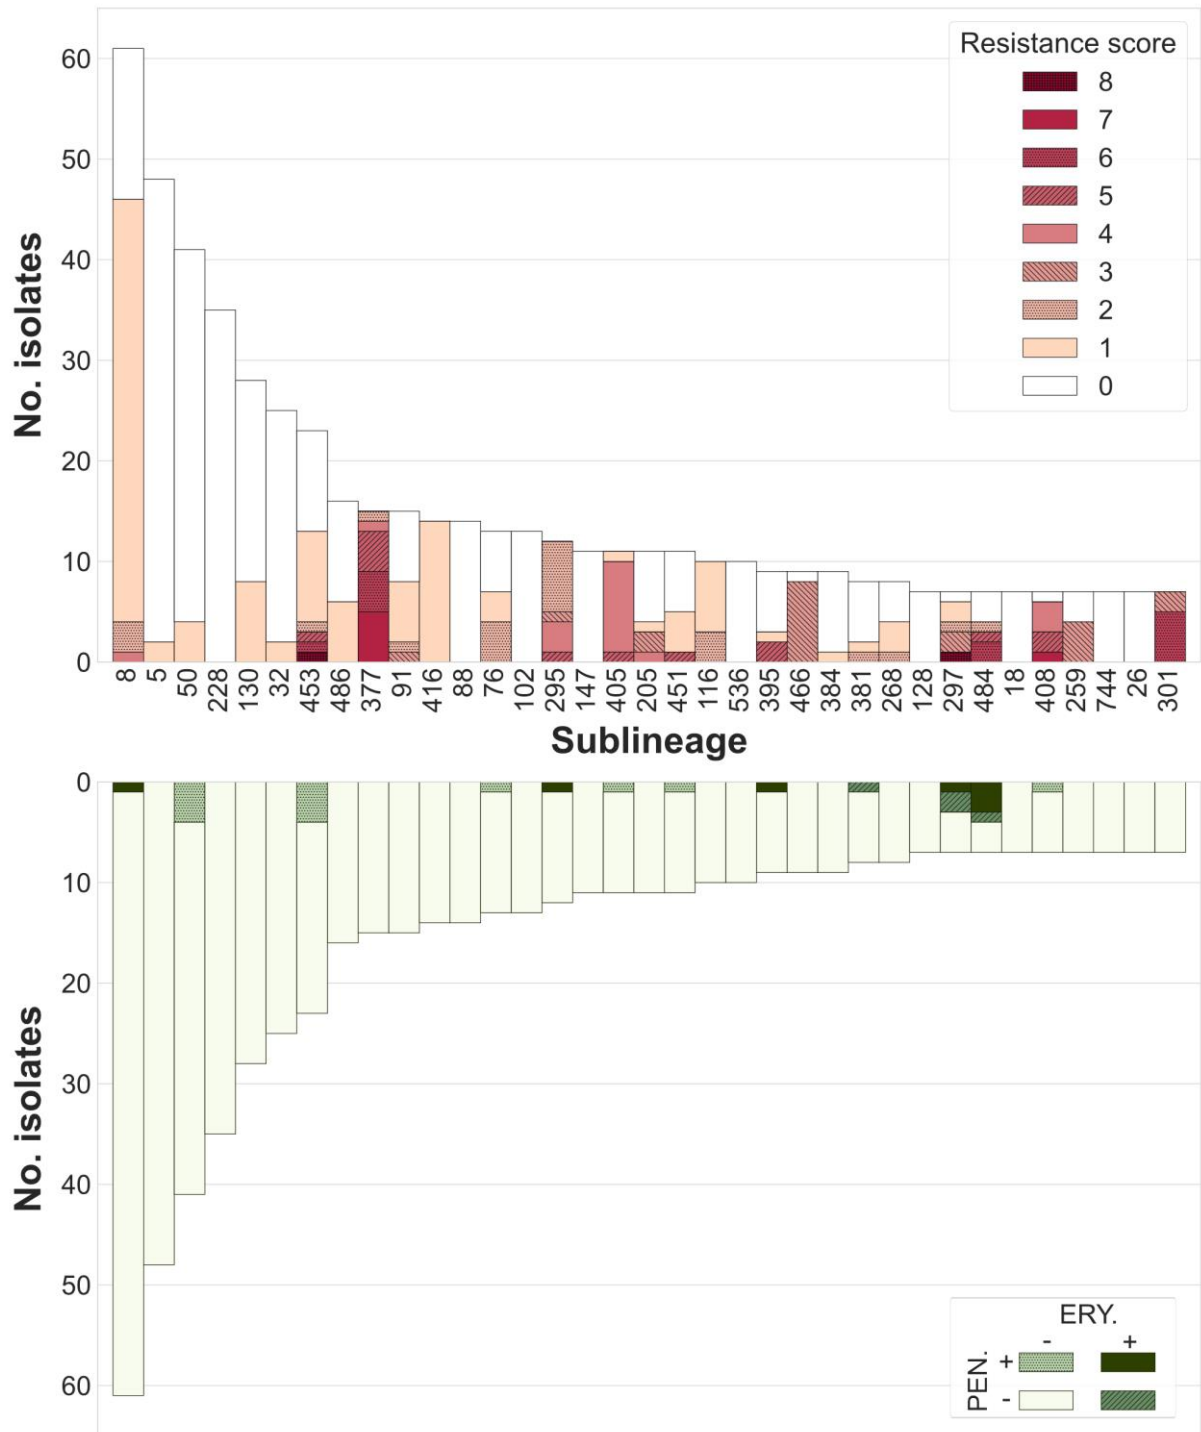

203

204

205 **Figure S8. Sublineage distribution of resistance features, including *pbp2m* and *ermX***

206 (Top) The bars height corresponds to the number of genomes per sublineage (entire dataset,  
 207 1,249 isolates). Bars are colored according to the resistance score, i.e. the number de resistance  
 208 families present in the strains (see color key).

209 (Bottom) Same as in A, with genomes carrying genes associated with resistance to penicillin  
 210 (PEN.) and/or erythromycin (ERY.) resistance being colored (see key).

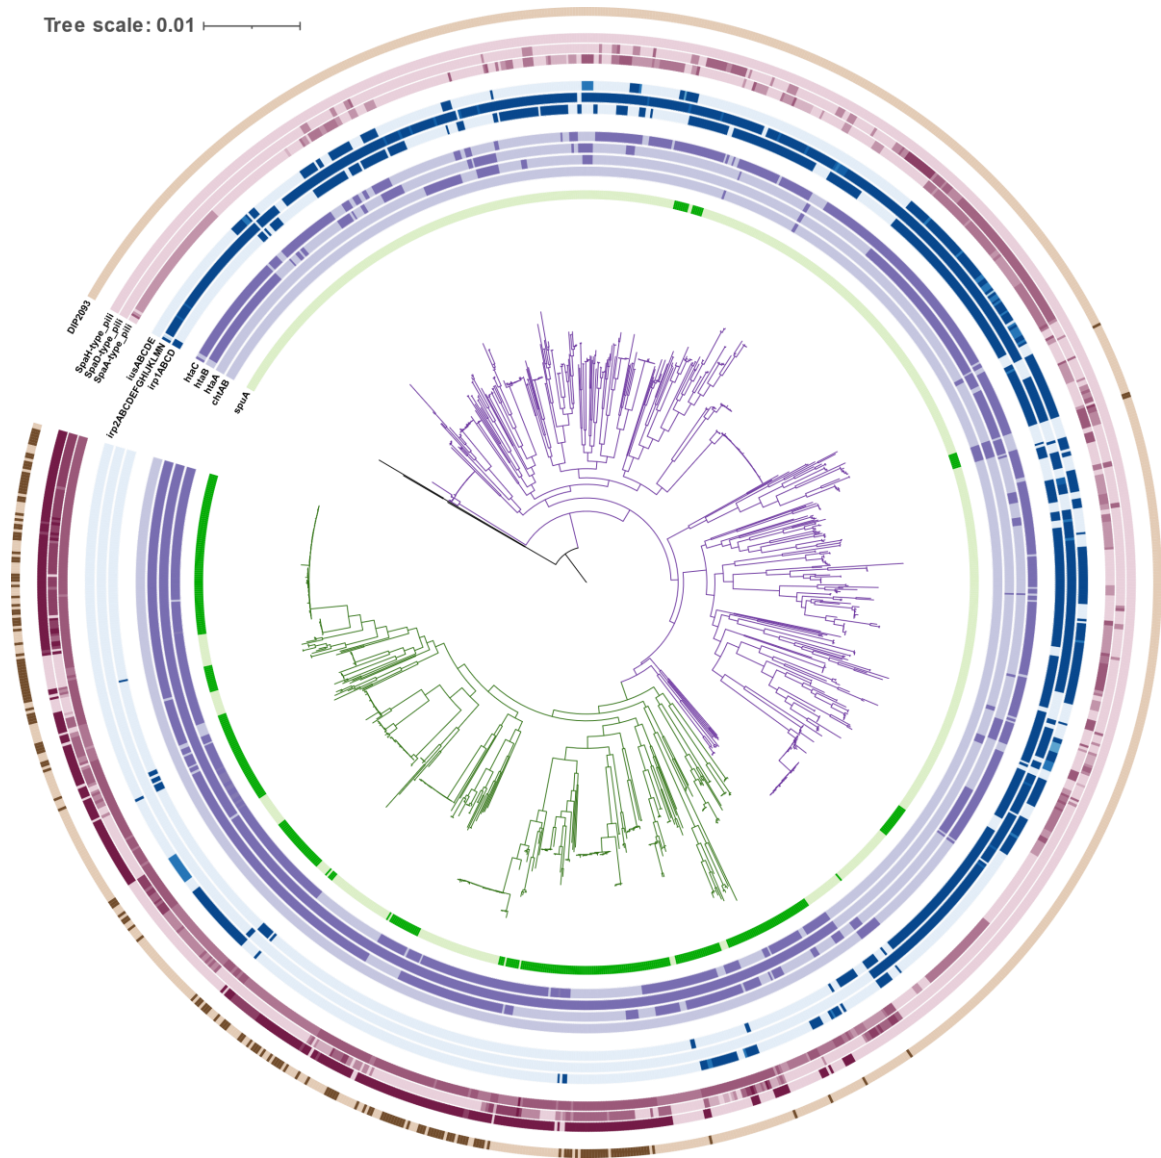

211

212 **Figure S9. Phylogenetic distribution of iron metabolism and adhesion-associated genes in**  
 213 ***Corynebacterium diphtheriae* lineages Mitis and Gravis**

214 The tree was obtained by maximum likelihood based on a multiple sequence alignment of the  
 215 core genome (as in main Figure). The scale bar gives the number of nucleotide substitutions  
 216 per site. The main lineages Mitis and Gravis are drawn using purple and green branches,  
 217 respectively. The first inner circle indicates the presence of the *spuA* gene (darker color:  
 218 presence). The four following circles indicate the presence of the heme metabolism-associated  
 219 genes *chtAB*, *htaA*, *htaB* and *htaC*. The three following circles indicate the presence of the iron  
 220 metabolism-associated genes: *irp1ABCD*, *irp2ABCDEFGHI-irp2JKLMN* and *iusABCDE*. Next,  
 221 three following circles indicate the presence of the fimbriae gene clusters: SpaA-type, SpaD-  
 222 type and SpaH-type. The most external circle indicates the presence of collagen-binding protein  
 223 DIP2093. For circles that represent clusters of genes, a color gradient represents the number of  
 224 genes present in the cluster (darker: more genes).
